# Supplementary material for: ZBTB28 induces autophagy by regulation of FIP200 and Bcl-XL facilitating cervical cancer cell apoptosis
Source: PubMed Central journal article supplement (PMC8086320; doi:10.1186/s13046-021-01948-0), 2021-04-30
Supplement: 13046_2021_1948_MOESM1_ESM.pdf [file 13046_2021_1948_MOESM1_ESM.pdf]

**Table.S1 Diagnostic efficacy of HPV and ZBTB28 methylation in cervical cancer tissues**

|             | <b>HPV</b>    | <b>ZBTB28</b> | <b>P value</b> |
|-------------|---------------|---------------|----------------|
| Sensibility | 32/48 (66.7%) | 45/48 (93.8%) | 0.254          |
| Specificity | 6/20 (30.0%)  | 17/20 (85.0%) | 0.202          |
| AUC         | 0.517         | 0.894         | <0.001         |

**Table.S2 List of RT-PCR primers**

| <b>PCR Primer</b> | <b>Sequence (5'-3')</b>  | <b>Product size(bp)</b> |
|-------------------|--------------------------|-------------------------|
| ZBTB28F           | CTACGTCCGCGAGTTCACTC     | 170bp                   |
| ZBTB28R           | CCCGGAAAATTGAATAGAAG     |                         |
| VIMF              | TGCCAACCTTTACAGACCTA     | 390bp                   |
| VIMR              | CTCATCTCCCTCCTCACTCA     |                         |
| EcadF             | CCTCCGTTTCTGGAATCCAA     | 282bp                   |
| EcadR             | GTTCTCTATCCAGAGGCTCT     |                         |
| NcadF             | CAGGTTTGGGAATGGGACAGT    | 480bp                   |
| NcadR             | TCCAGTAGGATCTCCGCCAC     |                         |
| HPV16F            | TTAGGCAGCACTTGGCCAACCA   | 207bp                   |
| HPV16R            | TAATCCGTCCTTTGTGTGAGCT   |                         |
| HPV18F            | CCGAGCACGACAGGAACGACT    | 173bp                   |
| HPV18R            | TCGTTTTCTTCCTCTGAGTCGCTT |                         |
| $\beta$ -actinF   | TCCTGTGGCATCCACGAAACT    | 315bp                   |
| $\beta$ -actinR   | GAAGCATTTGCGGTGGACGAT    |                         |

**Table.S3 List of qRT-PCR Primers**

| PCR Primer     | Sequence (5'-3')        | Product size (bp) | Annealing temperature (°C) |
|----------------|-------------------------|-------------------|----------------------------|
| ULK1F          | AGCACGATTTGGAGGTCGC     | 118bp             | 60                         |
| ULK1R          | GCCACGATGTTTTTCATGTTTCA |                   |                            |
| ULK2F          | GTGGTATTCGCATCAAATAGCG  | 145bp             | 60                         |
| ULK2R          | CACAAGTCAGCCTTAGCATCATA |                   |                            |
| ATG2BF         | GGACGGTTAATTGGTAGGTTGG  | 222bp             | 60                         |
| ATG2BR         | CTGCATGGGTCGATTTTTCT    |                   |                            |
| ATG3F          | GATGGCGGATGGGTAGATACA   | 125bp             | 60                         |
| ATG3R          | TCTTCACATAGTGCTGAGCAATC |                   |                            |
| ATG4BF         | GGTGTGGACAGATGATCTTTGC  | 172bp             | 60                         |
| ATG4BR         | CCAACTCCCATTTGCGCTATC   |                   |                            |
| ATG5F          | AGAAGCTGTTTCGTCCTGTGG   | 152bp             | 60                         |
| ATG5R          | AGGTGTTTCCAACATTGGCTC   |                   |                            |
| ATG7F          | CTGCCAGCTCGCTTAACATTG   | 216bp             | 60                         |
| ATG7R          | CTTGTTGAGGAGTACAGGGTTTT |                   |                            |
| ATG9AF         | CCAGAACTACATGGTGGCACT   | 131bp             | 60                         |
| ATG9AR         | GTCCCCAGAAGAGGATCAGC    |                   |                            |
| ATG10F         | CCCTTGGATGATTGTGAAGTGA  | 195bp             | 60                         |
| ATG10R         | CTGTAGCAGTCGCATCTTATAGC |                   |                            |
| ATG12F         | TAGAGCGAACACGAACCATCC   | 153bp             | 60                         |
| ATG12R         | CACTGCCAAAACACTCATAGAGA |                   |                            |
| qRT-PCR ATG13F | TTGCTATAACTAGGGTGACACCA | 137bp             | 60                         |
| ATG13R         | CCCAACACGAACTGTCTGGA    |                   |                            |
| ATG14F         | GCGCCAAATGCGTTCAGAG     | 91bp              | 60                         |
| ATG14R         | AGTCGGCTTAACCTTTCCTTCT  |                   |                            |
| ATG16L1F       | AACGCTGTGCAGTTCAGTCC    | 177bp             | 60                         |
| ATG16L1R       | AGCTGCTAAGAGGTAAGATCCA  |                   |                            |
| ATG16L2F       | TTAGCAGCAACTTACAACCAGG  | 226bp             | 60                         |
| ATG16L2R       | ACACCACGTCATTACAGTAGGA  |                   |                            |
| FIP200F        | GAAAGAGCTTGCTCAGGGATT   | 107bp             | 60                         |
| FIP200R        | TCATCAACTGATTTGCGTGA    |                   |                            |
| WIPI2F         | CCATCGTCAGCCTTAAAGCAC   | 136bp             | 60                         |
| WIPI2R         | TCCAGGCATACTATCAGCCTC   |                   |                            |
| WIPI3F         | CTCCTGCCGTGTAACCCTC     | 250bp             | 60                         |
| WIPI3R         | CCCAGATCATTACTTTGTTGGGA |                   |                            |
| WIPI4F         | GAGAAGCAACTGCTAGTGTTCC  | 146bp             | 60                         |
| WIPI4R         | GGCTGGTTTAGAGACACACAG   |                   |                            |
| ATG101F        | TTCATCGACTTCACTTATGTGCG | 177bp             | 60                         |
| ATG101R        | GATGCACTCGTCTGAGAATGG   |                   |                            |

---

|         |                  |                         |       |    |
|---------|------------------|-------------------------|-------|----|
|         | EPG5F            | AAGGCCAGCCGGACTAAAAC    | 161bp | 60 |
|         | EPG5R            | TGGGAATCAGTTACCACCTTCA  |       |    |
|         | AMBRA1F          | TGGGGAGGTTAGGATTTGGGA   | 98bp  | 60 |
|         | AMBRA1R          | GAGCCGTAGGGTGGAAAGC     |       |    |
|         | NBR1F            | AGGAGCAAAACGACTAGCTGC   | 96bp  | 60 |
|         | NBR1R            | TCTGGGGTCTTCATGTCTGAT   |       |    |
|         | VMP1F            | GACCAGAGACGTGTAGCAATG   | 212bp | 60 |
|         | VMP1R            | ACAATGCTTTGACGATGCCATAA |       |    |
|         | NANOGF           | ATGAGTGTGGATCCAGCTTG    | 190bp | 60 |
|         | NANOGR           | CCTGAATAAGCAGATCCATGG   |       |    |
|         | OCT4F            | AGCGATCAAGCAGCGACTAT    | 118bp | 60 |
|         | OCT4R            | TAGCCTGGGGTACCAAAATG    |       |    |
|         | KLF4F            | TCCCATCTTTCTCCACGTTT    | 262bp | 60 |
|         | KLF4R            | TCCAGGAGATCGTTGAACTC    |       |    |
|         | ABCG2F           | AACCTGGTCTCAACGCCAT     | 188bp | 60 |
|         | ABCG2R           | CAGAGTGCCCATCACAACA     |       |    |
|         | BMI1F            | GATCACTGAGCTAAATCCCC    | 287bp | 60 |
|         | BMI1R            | CAGAAGGATGAGCTGCATAAA   |       |    |
| qRT-PCR | MYCF             | GGAGGCTATTCTGCCCATTT    | 177bp | 60 |
|         | MYCR             | GTCGAGGTCATAGTTCCTGTTGG |       |    |
|         | TIP30F           | GGAAGACTTCAGGATGCAGA    | 235bp | 60 |
|         | TIP30R           | GAATCCAACATCATGACCTTG   |       |    |
|         | MAD2F            | AAATCGTGGCCGAGTTCTTC    | 244bp | 60 |
|         | MAD2R            | CTTTCCAGGACCTCACCCT     |       |    |
|         | STAT3F           | CCAATGGAATCAGCTACAGC    | 236bp | 60 |
|         | STAT3R           | GCTGATAGAGAACATTCGACTC  |       |    |
|         | CD44F            | TGGACAAGTTTTTGGTGGCAC   | 176bp | 60 |
|         | CD44R            | GGTGCTATTGAAAGCCTTGC    |       |    |
|         | BECN1F           | CCATGCAGGTGAGCTTCGT     | 215bp | 60 |
|         | BECN1R           | GAATCTGCGAGAGACACCATC   |       |    |
|         | Bcl-XLF          | GAGCTGGTGGTTGACTTTCTC   | 119bp | 60 |
|         | Bcl-XLR          | TCCATCTCCGATTGAGTCCCT   |       |    |
|         | BCL2F            | ATGTGTGTGGAGAGCGTCAACC  | 196bp | 60 |
|         | BCL2R            | TGAGCAGAGTCTTCAGAGACAGC |       |    |
|         | MCL1F            | TGCTTCGGAAACTGGACATCA   | 135bp | 60 |
|         | MCL1R            | TAGCCACAAAGGCACCAAAAG   |       |    |
|         | $\beta$ -actinF1 | GTCTTCCCCTCCATCGTG      | 113bp | 60 |
|         | $\beta$ -actinR1 | AGGGTGAGGATGCCTCTCTT    |       |    |

---

**Table.S4 List of ChIP-PCR Primers**

---

| <b>Primer</b>   | <b>Sequence (5'-3')</b> | <b>Product size (bp)</b> | <b>Annealing temperature (°C)</b> |
|-----------------|-------------------------|--------------------------|-----------------------------------|
| chip Bcl-XL F   | TCAGTGAGTGAGCAGGTGTT    | 225bp                    | 60                                |
| chip Bcl-XL R   | ATGGGTTGCCATTGATGGCA    |                          |                                   |
| chip FIP200 F1  | GAGCATCACAGCACTCACAA    | 169bp                    | 60                                |
| chip FIP200 R1  | GCAAATAGTTATTGGGGCGC    |                          |                                   |
| chip FIP200 F2  | CGCACCCGACCTTCTTTTAA    | 146bp                    | 60                                |
| chip FIP200 R2  | CGGACGAAAGCAAATGCTGT    |                          |                                   |
| chip ATG16L2 F1 | TTCGTGTCTCACAGTAGCCT    | 159bp                    | 60                                |
| chip ATG16L2 R1 | AGACGCTTCACCCCATT       |                          |                                   |
| chip ATG16L2 F2 | TTTTCGTGTACGGAACCTC     | 170bp                    | 60                                |
| chip ATG16L2 R2 | GCAGCAGGACAGCAAGATAA    |                          |                                   |

---
