# Supplementary material for: ZBTB28 induces autophagy by regulation of FIP200 and Bcl-XL facilitating cervical cancer cell apoptosis
Source: PubMed Central journal article supplement (PMC8086320; doi:10.1186/s13046-021-01948-0), 2021-04-30

### **Supplemental figures:**

**Figure S1. Nucleus localization of ZBTB28.** The localization of ZBTB28 and vimentin or Ecad in the nucleus of HeLa was analyzed by immunofluorescence.

**Figure S2. Regulation of ZBTB28 on Bcl-2 family proteins.** (A) The expression of BECN1 was analyzed. (B, C) The expression of BCL2 and MCL1 was analyzed by qRT-PCR. (D) Promoter luciferase activity of Bcl-XL in cervical cancer cells.

**Figure S3. ZBTB28 regulated ATG16L2 in cervical cancer cells.** (A, B) qRT-PCR results of ATGs mRNA expression in stable transfected cervical cancer cells. (C) Structure of wild-type ATG16L2 reporter plasmid. (D) % input of ATG16L2 DNA by HA-tag antibody were detected by ChIP-PCR. (E) Use dual luciferase reporter system to detect the effect of ZBTB28 on ATG16L2 promoter activity in 293T, CaSki and HeLa cells.

Figure S1

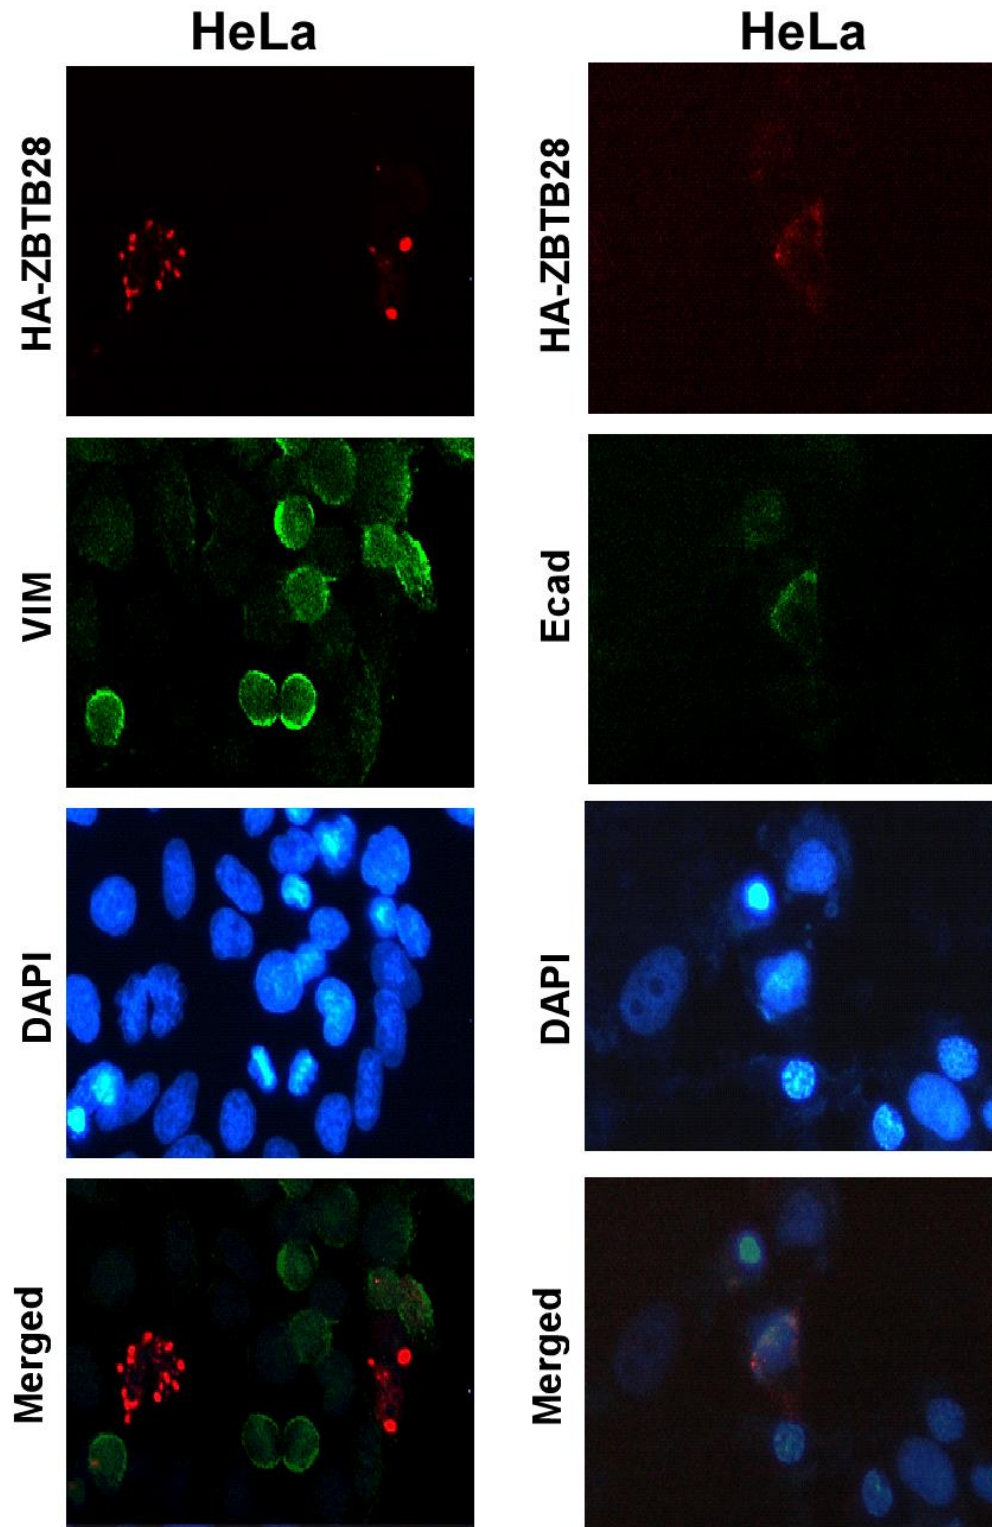

Figure S2

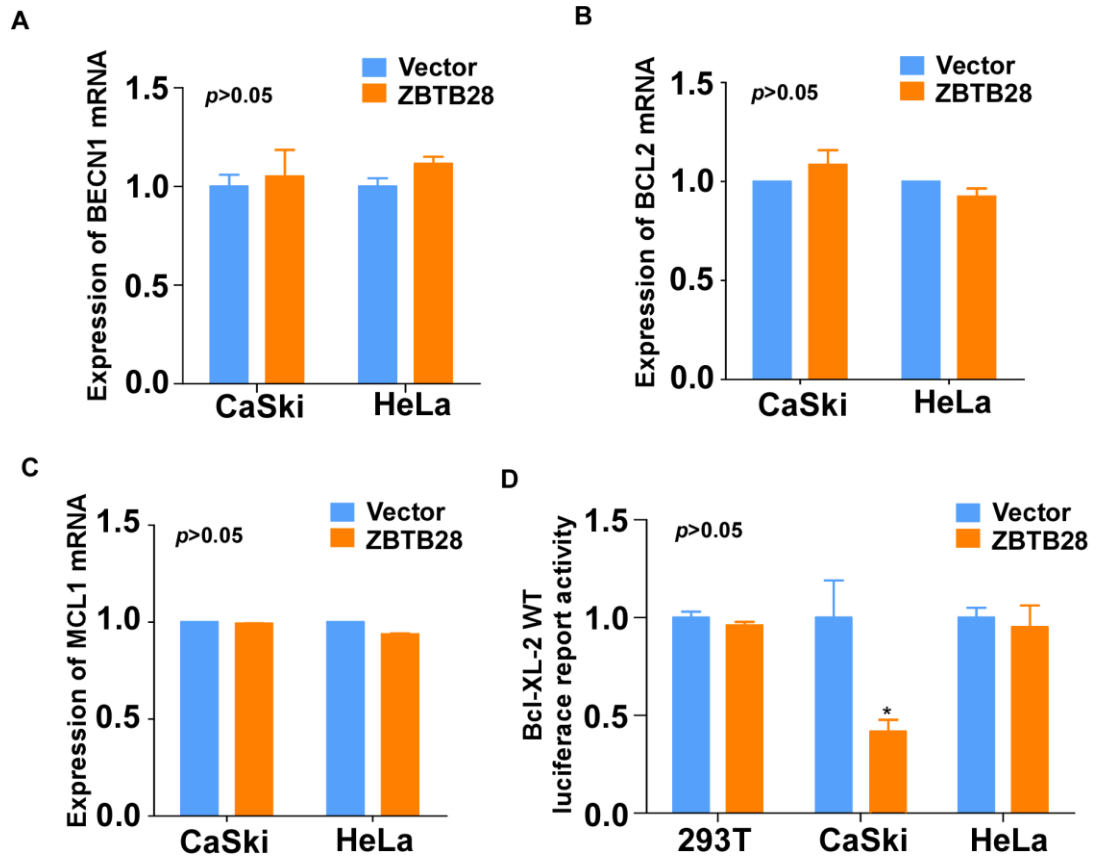

# Figure S3

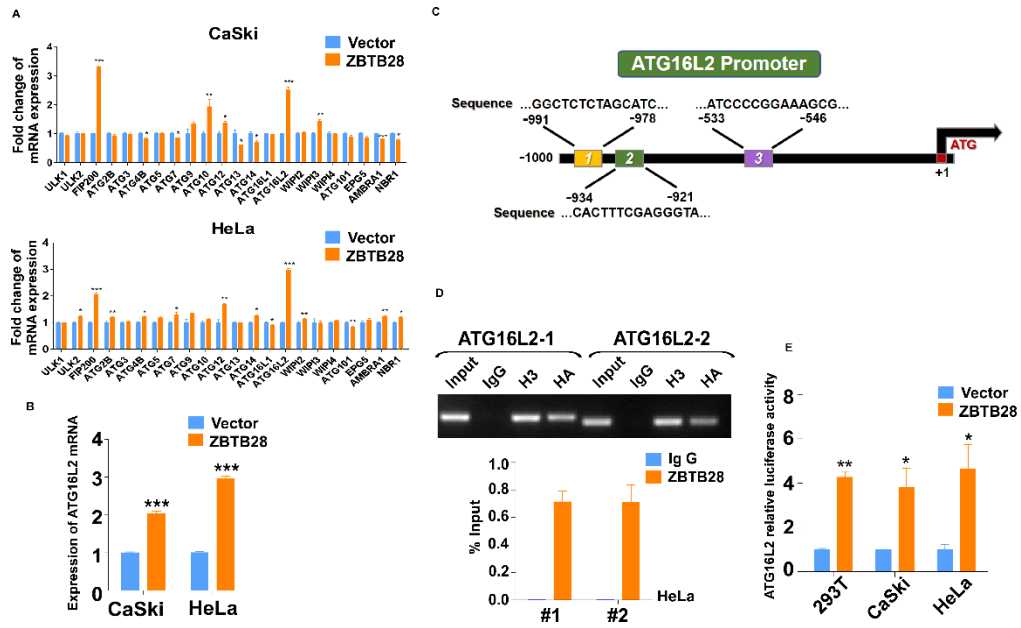

Supplement: 13046_2021_1948_MOESM2_ESM.pdf [file 13046_2021_1948_MOESM2_ESM.pdf]
